# Supplementary material for: Optimization of α-Fe2O3 Nanopillars Diameters for Photoelectrochemical Enhancement of α-Fe2O3-TiO2 Heterojunction
Source: MDPI journal article supplement (doi:10.3390/nano11082019), 2021-08-07
Supplement: s1 [file s1]

# Optimization of $\alpha$ -Fe<sub>2</sub>O<sub>3</sub> Nanopillars Diameters for Photoelectrochemical Enhancement of $\alpha$ -Fe<sub>2</sub>O<sub>3</sub>-TiO<sub>2</sub> Heterojunction

Herme G. Baldovi<sup>1,2</sup>

<sup>1</sup> Work address: Department of Chemical Engineering and Biotechnology, University of Cambridge, Philippa Fawcett Drive, CB3 0AS, Cambridge. UK; hergarba@cam.upv.es

<sup>2</sup> Current address: Departamento de Química, Universitat Politècnica de València, Camino de Vera s/n, 46022 Valencia, Spain

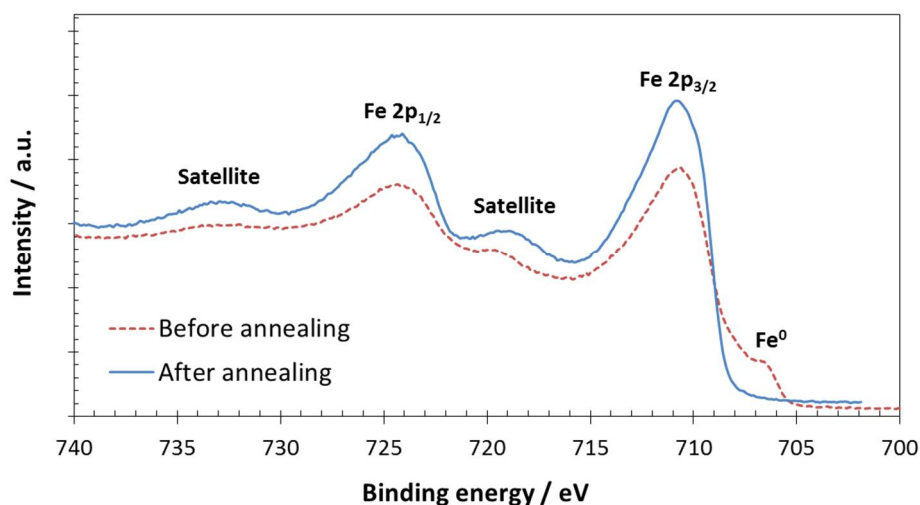

**Figure S1.** XPS analysis of the iron oxide sample before and after the annealing treatment at 500 °C for 1 with air flow.

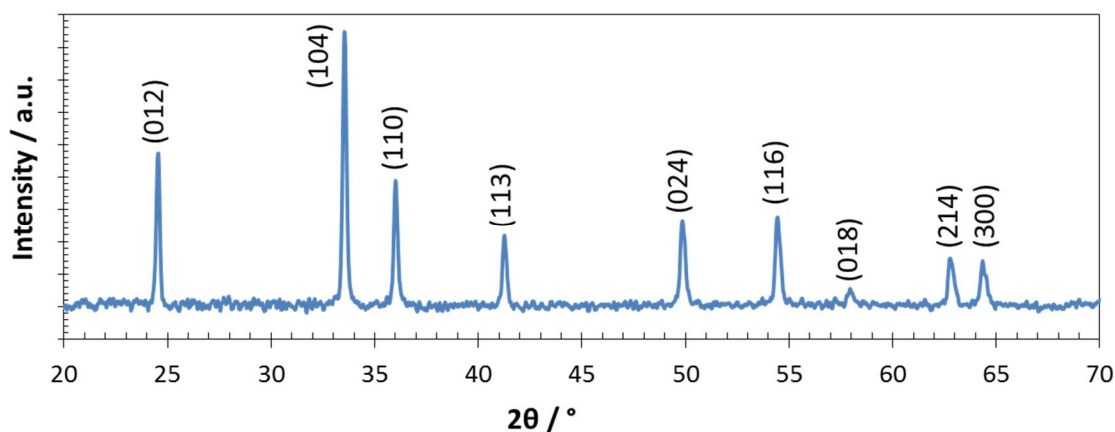

**Figure S2.** XRD analysis of the iron oxide sample after the annealing treatment at 500 °C for 1 with air flow.

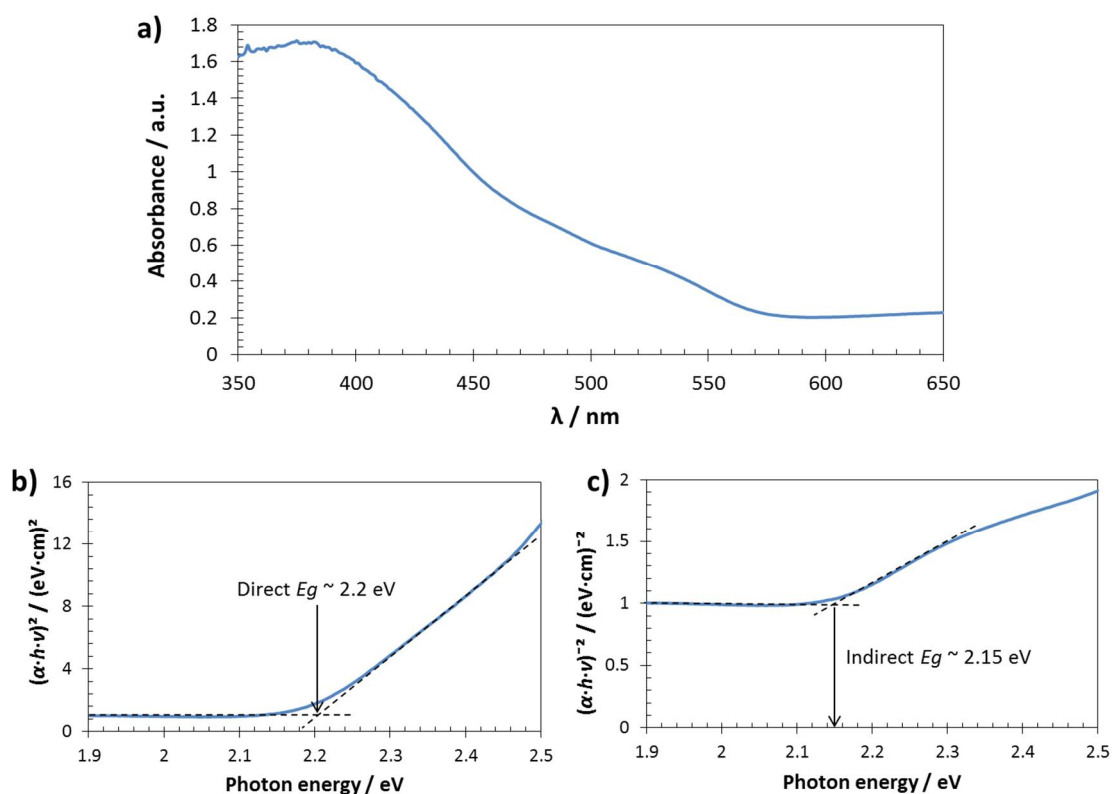

**Figure S3.** Diffuse reflectance UV-Vis spectrum of the hematite sample (a). Tauc's plots for the calculation of direct (b) and indirect (c) band gap energies.

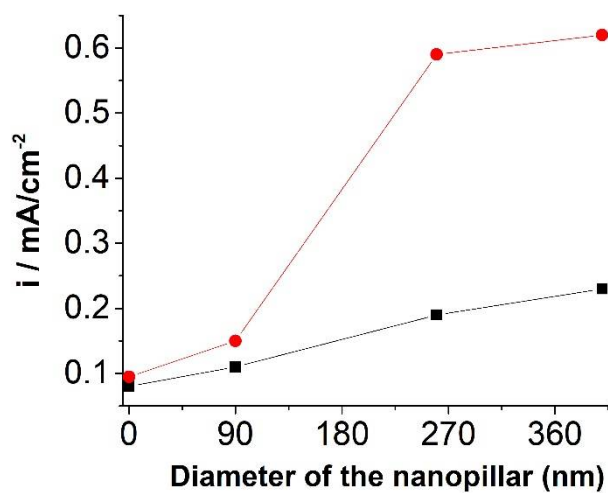

**Figure S4.** Comparison of photocurrent density under visible light irradiation and applying 0.5 V between hematite samples on FTO (●) and on titanium foil (■) substrates.

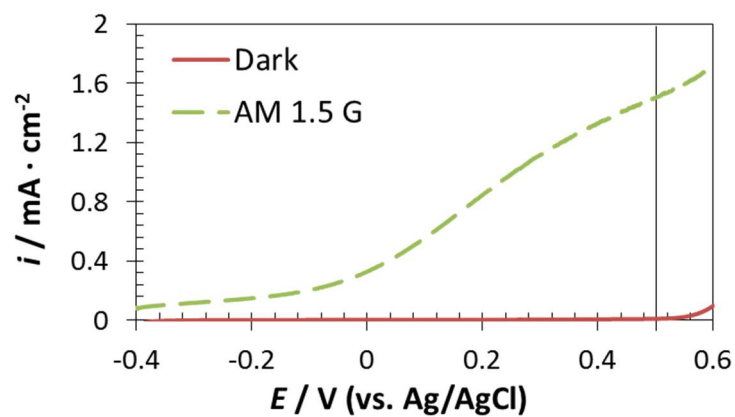

**Figure S5.** Current/photocurrent density versus applied potential curves of the electrode fabricated on Ti substrates using AAO template  $\phi 400$  nm. Dark and solar AM 1.5 G ( $55 \text{ mW} \cdot \text{cm}^{-2}$ ) illumination conditions were applied.

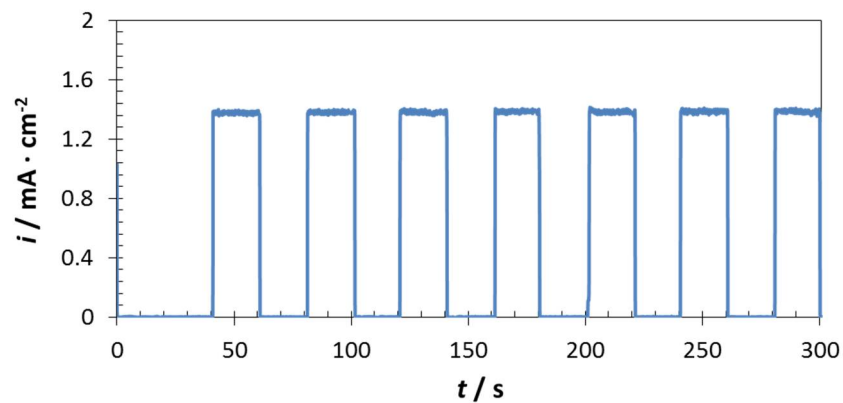

**Figure S6.** Chopped-light chronoamperometry measurements at 0.5 V (vs. Ag/AgCl) of the electrode fabricated on Ti substrates using AAO template  $\phi 400$  nm, under solar AM 1.5 G ( $55 \text{ mW} \cdot \text{cm}^{-2}$ ) illumination.
